# Supplementary material
Source: MDPI journal article supplement (https://www.mdpi.com/2079-6412/11/3/365)
Supplement: s1 [file s1]

# Supplementary Materials: Two-Step Deposition of Silicon Films Using the Gas Phase Generation of Nanoparticles in the Chemical Vapor Deposition Process

Jae-Ho Suk, Sung-Chun Hong, Gil-Su Jang and Nong-Moon Hwang \*

Department of Material Science and Engineering, College of Engineering at Seoul National University, 1 Gwanak-ro, Gwanak-gu, Seoul 08826, Korea; jhsuk@snu.ac.kr (J.-H.S.); brighthong@snu.ac.kr (S.-C.H.); gsjang@snu.ac.kr (G.-S.J.)

\* Correspondence: nmhwang@snu.ac.kr

**Citation:** Suk, J.-H.; Hong, S.-C.; Jang, G.-S.; Hwang, N.-M. Two-Step Deposition of Silicon Oxide Films Using the Gas Phase Generation of Nanoparticles in the Chemical Vapor Deposition Process. *Coatings* **2021**, *11*, 365. <https://doi.org/10.3390/coatings11030365>

Academic Editor: Waseem Haider

Received: 4 March 2021

Accepted: 22 March 2021

Published: 23 March 2021

**Publisher's Note:** MDPI stays neutral with regard to jurisdictional claims in published maps and institutional affiliations.

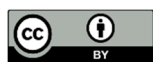

**Copyright:** © 2021 by the authors. Licensee MDPI, Basel, Switzerland. This article is an open access article distributed under the terms and conditions of the Creative Commons Attribution (CC BY) license (<http://creativecommons.org/licenses/by/4.0/>).

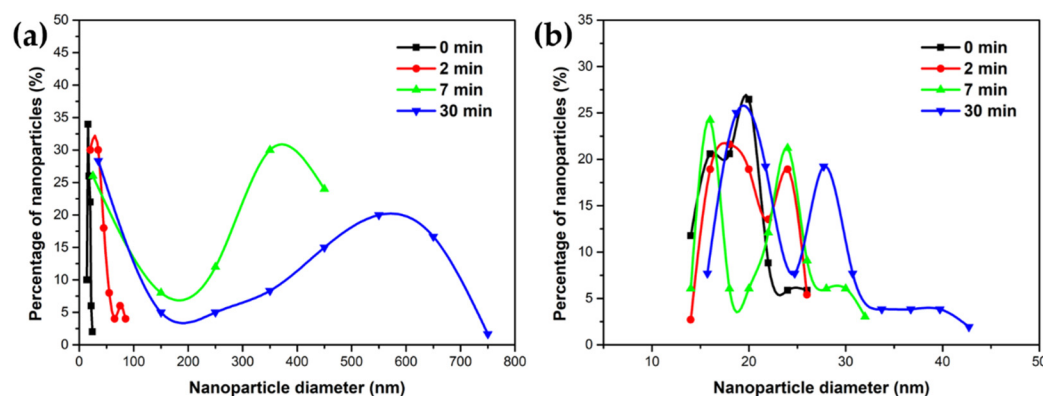

**Figure S1.** Size distributions of captured nanoparticles for delay times of 0, 2, 7 and 30 min (a) with and (b) without the nozzle tube.

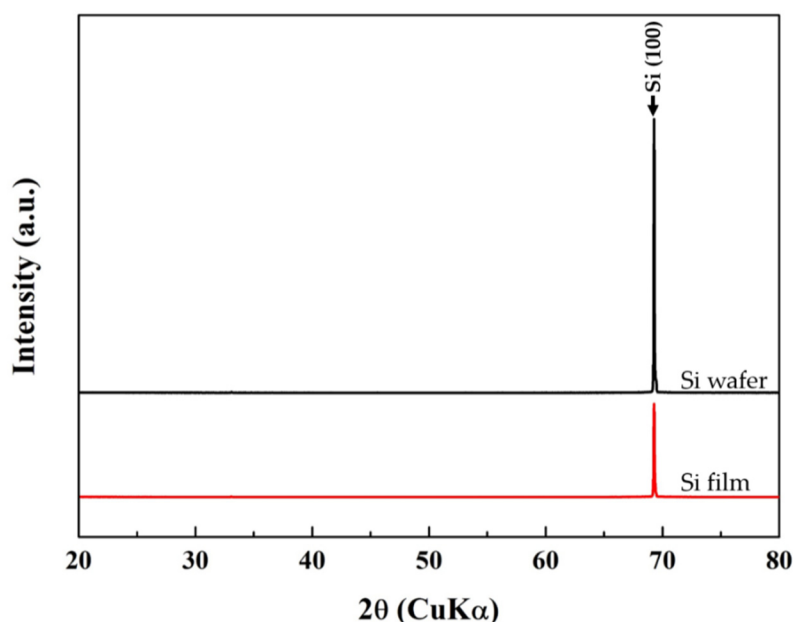

**Figure S2.** XRD data of the Si wafer and deposited Si film.

**Table S1.** EDS analysis of deposited Si thin film.

| Element | Weight% | Atomic% |
|---------|---------|---------|
| O       | 37.45   | 51.24   |
| Si      | 62.55   | 48.76   |
